# Supplementary material
Source: Springer Nature journal article supplement (https://www.springermedizin.de/resource/supplementary/13019_2007_115_MOESM2_ESM.pdf/9637878)

# Estimated survival function

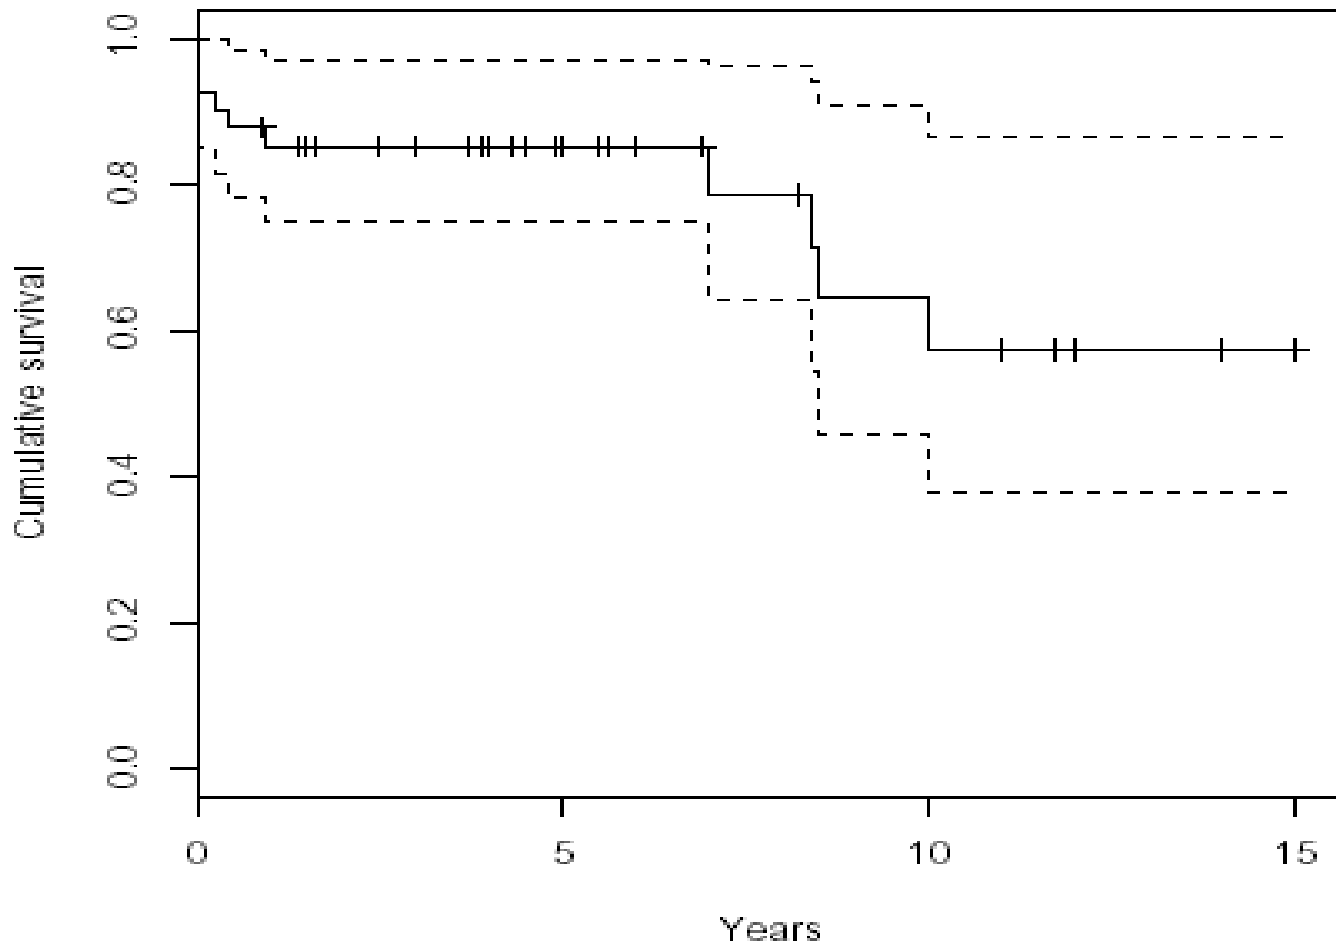

Supplement: MOESM2 [file 9637878]
